# Supplementary material
Source: PubMed Central journal article supplement (PMC8091100)
Supplement: IAI.00696-20-s0001.pdf [file IAI.00696-20-s0001.pdf]

**Table S1. Primer sequences used in this study**

| Primers   | Primer sequences (5' to 3')                                                                     | PCR products                                              | Size    | Reference sequence |
|-----------|-------------------------------------------------------------------------------------------------|-----------------------------------------------------------|---------|--------------------|
| P1        | CG <i>gaattc</i> ( <i>EcoRI</i> ) <sup>a</sup> <b>ACCGCTTGT</b> <sup>b</sup> TGTGAAAATATGGAGGGG | upstream of <i>nanH</i>                                   | 504 bp  | HAPS_RS07830       |
| P2        | <u>TTTTATCTTGTGCAATG</u> <sup>c</sup> TTTAGAATCATTAATGTCCA                                      |                                                           |         |                    |
| P3        | <u>ATCAGAATTGGTTAATTGC</u> CCTTGAATGGAATCTTCC                                                   | downstream of <i>nanH</i>                                 | 522 bp  |                    |
| P4        | CG <i>ggatcc</i> ( <i>BamHI</i> ) <b>ACAAGCGGT</b> ACTTTTTCTACTAACCGTCT                         |                                                           |         |                    |
| P5        | CATTGCACAAGATAAAAA                                                                              | <i>kan</i> gene                                           | 909 bp  | MN913428.1         |
| P6        | CAATTAACCAATTCTGAT                                                                              |                                                           |         |                    |
| P7        | CGATGTAGTTGAAGTGAA                                                                              | <i>nanH</i> gene and its upstream and downstream          | 2500 bp | HAPS_RS07830       |
| P8        | TTATTAACAGCGACATCC                                                                              |                                                           |         |                    |
| P9        | TGCAAAAGGGCTTTGGGTACC <u>ATGAAAAGAAGATTATCTAAAA</u><br><u>TGTAAATG</u>                          | <i>nanH</i> operator for complementation                  | 2652 bp |                    |
| P10       | AGGGAACAAAAGCTGGAGCTCTTACCAAGTATAACTGATATCTA<br><u>CACCTAAATT</u>                               |                                                           |         |                    |
| P11       | CG <i>gaattc</i> ( <i>EcoRI</i> ) GAAAAGCGATTTAAACGAG                                           | <i>nanH</i> functional region for expression in <i>E.</i> | 2314 bp |                    |
| P12       | CCG <i>ctcgag</i> ( <i>XhoI</i> ) CCAAGTATAACTGATATCTACAC                                       | <i>coli</i>                                               |         |                    |
| P13       | ATGCCTTTGCGAAGAGCT                                                                              | internal region of <i>nanH</i> gene                       | 594 bp  |                    |
| P14       | CCCCTAGCCCAGTTATCAT                                                                             |                                                           |         |                    |
| 16SrRNA-F | GGCTTCGTCACCCTCTGT                                                                              | 16SrRNA                                                   | 822 bp  | NR_042879.1        |
| 16SrRNA-R | GTGATGAGGAAGGGTGGTGT                                                                            |                                                           |         |                    |
| 5I-F      | TAAGCTTGC GGCCGCAATTC <u>ATGGTGCCCTGCTGCTG</u>                                                  | Siglec-5 gene                                             | 1665 bp | XM-003121417.4     |
| 5I-R      | TTTGTAGTCAGCCCGGGATCC <u>TTTGCTTTTTCTGATCTCTGAGTA</u><br><u>CTC</u>                             |                                                           |         |                    |

<sup>a</sup> Restriction enzyme sites are lowercase italic letters, and the additional 5' sequences are in uppercase letters.

<sup>b</sup> The uptake signal sequence is displayed in bold.

<sup>c</sup> The overlapping regions for PCR are underlined.

1

**Table S2. Quantitative RT-PCR primers used in this study**

| Primers          | Sequence (5' to 3')      | Size   | Reference sequence |
|------------------|--------------------------|--------|--------------------|
| Siglec-2F        | CCTGGACGGTCAATCATC       | 184 bp | XM-021097121.1     |
| Siglec-2R        | GCCTTCTGGTTCTTGTAGAG     |        |                    |
| Siglec-3F        | TCCAGTGACCACAAACAAC      | 157 bp | XM-021094848.1     |
| Siglec-3R        | TCCTCTTTCCACCCGAAA       |        |                    |
| Siglec-5F        | GAGGCCCAGAACGTCTAC       | 168 bp | XM-003127386.4     |
| Siglec-5R        | TCTGCGGCGTTTGACTAG       |        |                    |
| Siglec-10F       | TGCAGCCAGATGAGAAGG       | 96 bp  | XM-021094936.1     |
| Siglec-10R       | GGAGCAGGCAGAGAAGAA       |        |                    |
| Siglec-14F       | GGACCGATTCCAACCTCTC      | 114 bp | XM-003127392.4     |
| Siglec-14R       | CTGTGTTCTTCCTCCAGC       |        |                    |
| Siglec-15F       | GGCCCAGGTGAAGATCAC       | 131 bp | XM-003121417.4     |
| Siglec-15R       | CGGAAGCGGAACAAGTAGA      |        |                    |
| GAPDH-F          | CACAGTCAAGGCGGAGAAC      | 106 bp | NM_001206359.1     |
| GAPDH-R          | CGTAGCACCAGCATCACC       |        |                    |
| IL-1 $\alpha$ -F | CCTCTAAGACATCCAGGCTAA    | 83 bp  | NM_214029.1        |
| IL-1 $\alpha$ -R | CAACCGTCTCTTCTCAGAATC    |        |                    |
| TNF- $\alpha$ -F | CACCACGCTCTTCTGCCTAC     | 132 bp | NM_214022.1        |
| TNF- $\alpha$ -R | ACGGGCTTATCTGAGGTTTGAG   |        |                    |
| IL-6-F           | CCCTGAGGCAAAAAGGGAAAGA   | 212 bp | NM_214399.1        |
| IL-6-R           | CGTGGACGGCATCAATCTCA     |        |                    |
| IL-8-F           | CAAGGAACTGAGAGTGATTGAGAG | 165 bp | NM_213867.1        |
| IL-8-R           | TACTGCTGTTGTTGTTGCTTCT   |        |                    |
| IL-10-F          | TCTGCCTTATTCTTCTGACTCTGA | 102 bp | NM_001008691.1     |
| IL-10-R          | TCGGATTAACAGGTCTGTCACT   |        |                    |
| IL-12-F          | GATGCTGGCCAGTACACC       | 377 bp | U08317.1           |
| IL-12-R          | TCCAGCACGACCTCAATG       |        |                    |

2

3

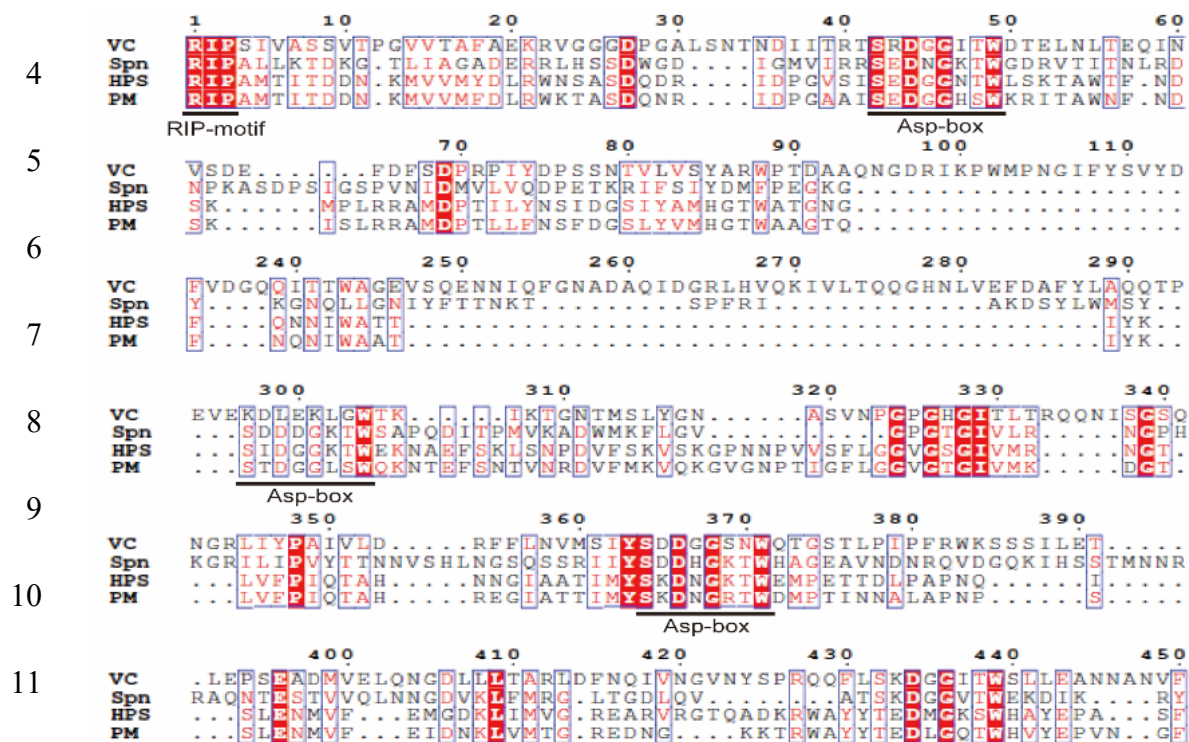

Fig. S1 The motifs of the sialidase of *Glaesserella parasuis* JS0135

Porcine Siglec-5

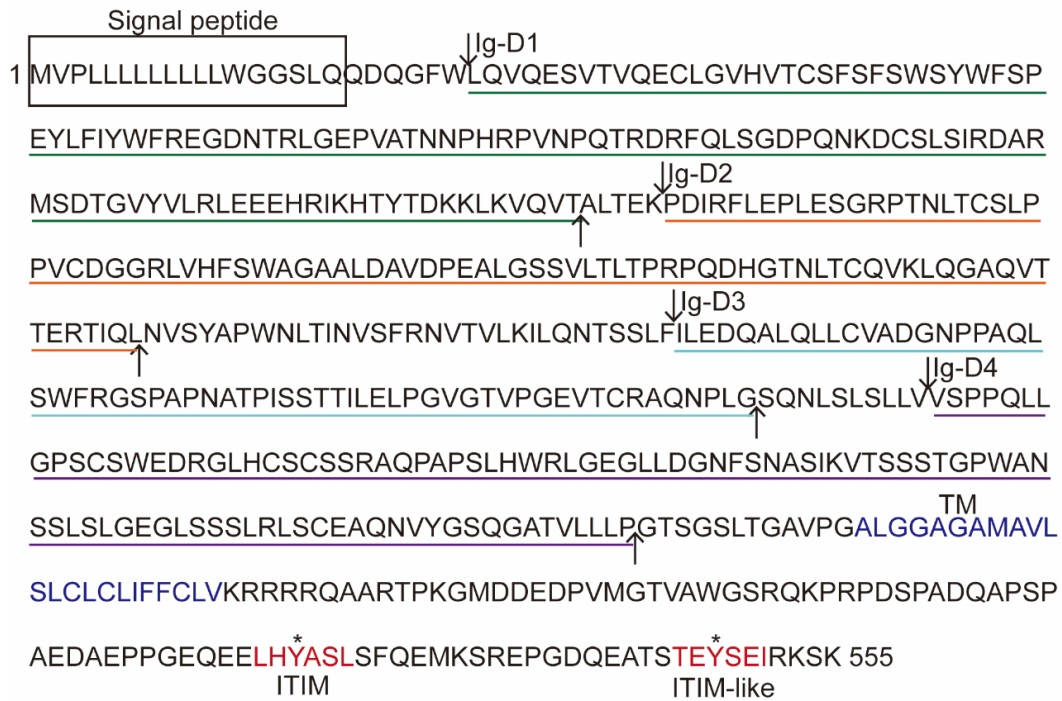

15

16 **Fig S2. Amino acid sequence of porcine Siglec-5.** The N-terminal is an 18-amino acid long  
 17 hydrophobic signal peptide (indicated in a box). There are four immunoglobulin-like domains.  
 18 One V-type domain is underlined using a green line, followed by three C2-type domains  
 19 underlined by orange, blue, and purple lines. The blue sequence indicates the transmembrane  
 20 region. In the putative cytoplasmic tail, there are two tyrosine residues, Y525 and Y548, marked  
 21 by an asterisk. Y525 is embedded in LHYASL, named ITIM motif, and Y548 is included in  
 22 TEYSEI, similar to ITIM-like motifs.

23
